# Supplementary material
Source: PubMed Central journal article supplement (PMC8096711)
Supplement: NIHMS1685710-supplement-Supplemental_Publication_Material.pdf [file NIHMS1685710-supplement-Supplemental_Publication_Material.pdf]

## SUPPLEMENTAL MATERIAL

**Supplemental Table I** – Selective reaction monitoring (SRM) transitions for acyl carnitine analysis

| <b>Acyl Carnitine</b>                                   | <b>Transition, m/z</b> | <b>Retention Time</b> |
|---------------------------------------------------------|------------------------|-----------------------|
| <sup>12</sup> C acetyl (C2)                             | 204.1→85               | 1.50-1.51             |
| <sup>13</sup> C acetyl (C2)                             | 205.1→85               | 1.50-1.51             |
| Acetyl-d <sub>3</sub> -carnitine<br>(internal standard) | 207.1→85               | 1.50-1.51             |
| <sup>12</sup> C butyryl (C4)                            | 232.1→85               | 5.35-5.36             |
| <sup>13</sup> C butyryl (C4)                            | 234.1→85               | 5.35-5.36             |
| <sup>12</sup> C 3-hydroxybutyryl-<br>L (L-C4OH)         | 248.1→85               | 2.43-2.44             |
| <sup>13</sup> C 3-hydroxybutyryl-<br>L (L-C4OH)         | 250.1→85               | 2.43-2.44             |
| <sup>12</sup> C 3-hydroxybutyryl-<br>D (D-C4OH)         | 248.1→85               | 2.94-2.95             |
| <sup>12</sup> C 3-hydroxybutyryl-<br>D (D-C4OH)         | 250.1→85               | 2.94-2.95             |

## Supplemental Table II – Patient characteristics

Data shown are means  $\pm$  standard error of the mean

| <b>Variables</b>                            | <b>Control (n=5)</b> | <b>Non-ischemic cardiomyopathy (n=5)</b> | <b>p-value</b> |
|---------------------------------------------|----------------------|------------------------------------------|----------------|
| Age at heart tissue acquisition, years      | 41 $\pm$ 8           | 46 $\pm$ 4                               | 0.58           |
| Male sex, n (%)                             | 5 (100)              | 5 (100)                                  | 0.99           |
| White or Caucasian race, n (%)              | 5 (100)              | 5 (100)                                  | 0.99           |
| Body mass index, Kg/m <sup>2</sup>          | 27 $\pm$ 1           | 29 $\pm$ 3                               | 0.58           |
| Diabetes mellitus, n (%)                    | 0 (0)                | 0 (0)                                    | 0.99           |
| Left ventricular ejection fraction, %       | 67 $\pm$ 3           | 16 $\pm$ 4                               | <0.0001        |
| Left ventricular end-diastolic diameter, cm | 4.5 $\pm$ 0.3        | 7.3 $\pm$ 0.4                            | <0.001         |
| Cardiac index, L/min/m <sup>2</sup>         | 4.1 $\pm$ 0.5        | 1.8 $\pm$ 0.2                            | <0.01          |

**Supplemental Table III – Antibodies used for Western Blotting**

| <b>Antibody</b>                                          | <b>Vendor</b> | <b>Catalogue</b> |
|----------------------------------------------------------|---------------|------------------|
| Acyl CoA synthetase medium chain family member 3 (ACSM3) | Proteintech   | 10168-2-AP       |
| $\beta$ -hydroxybutyrate dehydrogenase 1 (BDH1)          | Proteintech   | 15417-1-AP       |
| Calsequestrin (CASQ)                                     | ThermoFisher  | PA1-913          |
| Carnitine palmitoyl transferase 1a (CPT1a)               | Abcam         | Ab128568         |
| Carnitine palmitoyl transferase 1b (CPT1b)               | Proteintech   | 22170-1-AP       |
| Short chain acyl CoA dehydrogenase (SCAD)                | GeneTex       | GTX55489         |

**Supplemental Table IV – Primer sequences for mRNA analysis**

| Gene                                                  | Primer Sequence                                                               |
|-------------------------------------------------------|-------------------------------------------------------------------------------|
| $\beta$ -hydroxybutyrate dehydrogenase 1 (BDH1) rat   | Forward: AGG CTG TGA CTC TGG ATT TG<br>Reverse: AGC ATC GCC TTT GTC CTT       |
| $\beta$ -hydroxybutyrate dehydrogenase 1 (BDH1) human | TaqMan assay catalogue number<br>Hs00366297_m1                                |
| Short chain acyl CoA dehydrogenase (SCAD) rat         | Forward: CTC GAG ATT GGC GAA GAT TAC A<br>Reverse: CAG CTC CTT CTC AGC AAA GT |
| Short chain acyl CoA dehydrogenase (SCAD) human       | TaqMan assay catalogue number<br>Hs00163506_m1                                |

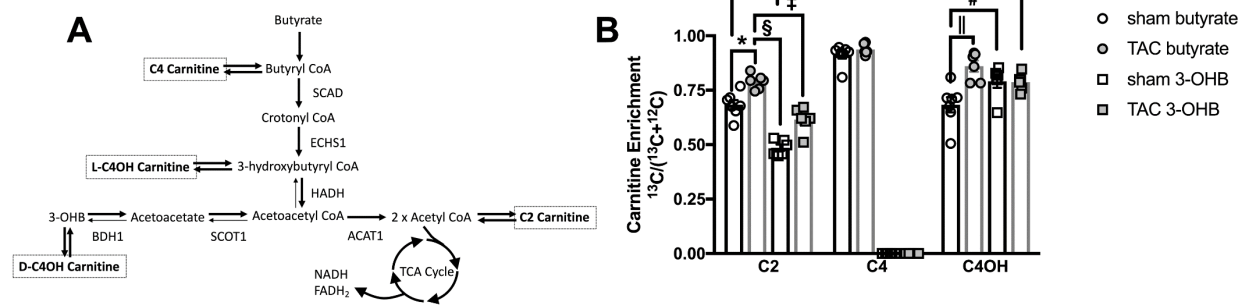

**Supplemental Figure I – The enrichment of short chain acyl carnitine species with  $^{13}\text{C}$  labelled carnitine.** Short chain carnitine species were measured by LC/MS and the enrichment of the pool with  $^{13}\text{C}$  carnitine species was determined. **A**, A depiction of the different short chain carnitine pools and their origination within the oxidative pathway for ketones and SCFA. **B**, Mean enrichment data for the different short chain carnitine pools with  $^{13}\text{C}$  labeled carnitine species is shown \* $p=0.0029$ , † $p<0.0001$ , ‡ $p<0.008$ , †† $p<0.0001$ , ‡‡ $p<0.0001$ , # $p=0.0022$ , \*\* $p=0.0035$  with comparisons as indicated via 2-way ANOVA and Tukey's post hoc test measured in hearts perfused with either  $^{13}\text{C}$  butyrate (n=7 sham, n=6 TAC) or  $^{13}\text{C}$  3-OHB (n=6 sham, n=6 TAC).

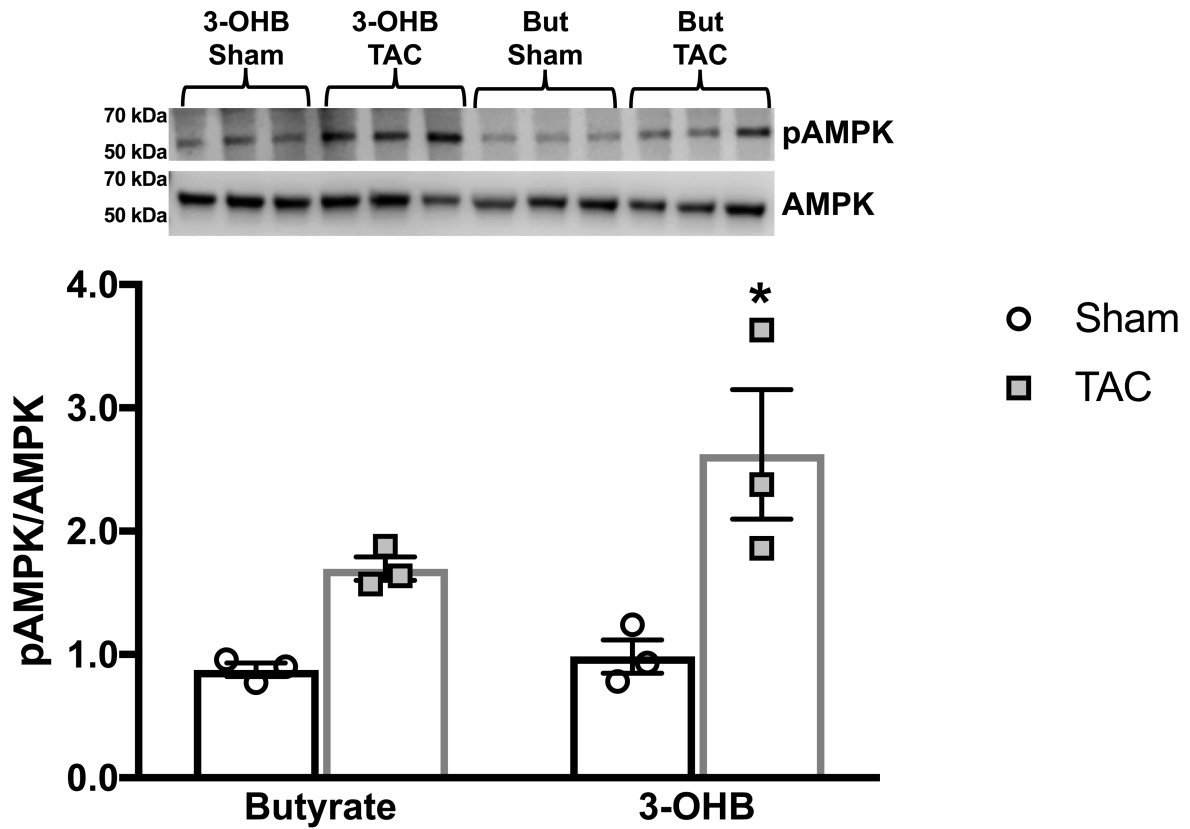

**Supplemental Figure II – The phosphorylation of AMPK (pAMPK) and total AMPK measured in hearts after perfusion with either the SCFA butyrate or the ketone 3-hydroxybutyrate (3-OHB). Hearts were perfused 14 weeks after TAC or sham surgery. \* $p < 0.05$  vs. butyrate sham and 3-OHB sham via 2-way ANOVA and Tukey's post hoc test,  $n=3$  for all groups.**
